# Supplementary material for: Microfluidic AAV Purity Characterization: New Insights into Serotype and Sample Treatment Variability
Source: PubMed Central journal article supplement — ACS Omega. 2024 Jan 10;9(3):4027–36. doi: 10.1021/acsomega.3c09006 (PMC10809679; doi:10.1021/acsomega.3c09006), 2024-01-10
Supplement: ao3c09006_si_001.pdf [file ao3c09006_si_001.pdf]

1  
2  
3  
4  
5  
6  
7  
8  
9  
10  
11  
12  
13  
14  
15  
16  
17  
18  
19  
20  
21  
22  
23  
24

Supporting Information

**Microfluidic AAV Purity Characterization: New Insights into Serotype and Sample Treatment Variability**

Adriana Coll De Peña,<sup>1,+</sup> James D. White,<sup>2,+</sup> Dipti R. Mehta,<sup>2,+</sup> Menel Ben Frej,<sup>2</sup> and Anubhav Tripathi<sup>1,\*</sup>

<sup>1</sup>Center for Biomedical Engineering, School of Engineering, Brown University, Providence, RI, USA

<sup>2</sup>Applied Genomics, Revvity, Hopkinton, MA, USA

<sup>+</sup>These authors contributed equally

\*Correspondence should be addressed to the following author:  
Anubhav Tripathi (PhD)  
Center for Biomedical Engineering, School of Engineering,  
182 Hope St, Providence, RI 02912, USA  
Email: anubhav\_tripathi@brown.edu

25 **Contents**

26 Methods for Capsid Protein and ssDNA Characterization .....3

27 Figure S1. Comparison of VP Properties Across the Two Methods.....4

28 Table S1. Sizing Accuracy of VPs using the Non-Covalent and Covalent Methods.....4

29 Table S2. Percentage Full Prediction Accuracy of AAV8 Reference Standard.....5

30 Figure S2. Comparison of UV/Vis (Stunner) and LabChip Percentage Full Predictions .....5

31

32

### 33 Methods for Capsid Protein and ssDNA Characterization

34 For the characterization of the capsid proteins, two different protein assay protocols, whose key  
35 difference was the use of a fluorescent non-covalent dye (Protein Express, Revvity) or a covalent dye  
36 (AAV Pico Protein, Revvity), were followed to investigate how different fluorophore types interact with  
37 the capsid proteins. The non-covalent dye protocol, as previously described in Coll De Peña et al.,<sup>23</sup>  
38 required the mixing of 5  $\mu\text{L}$  of the sample with 7  $\mu\text{L}$  of denaturing reducing buffer with 0.03 M DTT,  
39 heated at 100°C for 5 min, and then diluted with 32  $\mu\text{L}$  of nuclease-free water prior to analysis. Since the  
40 labeling in this protocol is dynamic and takes place on the chip, the chip is loaded with a gel-dye mixture  
41 and a lower marker (Revvity) and analyzed using the Protein Express assay script. In the case of the  
42 covalent dye, 4  $\mu\text{L}$  of AAV sample was mixed with 1  $\mu\text{L}$  of 5x Labeling Buffer with 0.17 M DTT  
43 (Revvity) and denatured at 75°C for 5 min. The denatures samples were mixed with 5  $\mu\text{L}$  of 20  $\mu\text{M}$   
44 covalent dye (Revvity), shake mixed for 1 min, spun down for 1 min at 1,000 g, and incubated at 35°C for  
45 15 min in the dark. Lastly, 5  $\mu\text{L}$  of the labeled sample were mixed in a 96- or 384-well plate with 5  $\mu\text{L}$  of  
46 Stop Solution (Revvity), shake mixed for 1 min, spun down, and transferred to the LabChip platform. The  
47 microfluidic chip was loaded with AAV Pico Protein Express gel matrix and lower marker (Revvity) and  
48 transferred to the LabChip platform for analysis using the AAV Pico Protein Express assay script.

49 In contrast, to assess the nucleic acid content of the AAV samples, the capsid was digested via a  
50 urea and proteinase K treatment with heat, as described in our previous study,<sup>23</sup> or only heat to extract  
51 the NA. In the case of the urea and proteinase K treatment, 10  $\mu\text{L}$  of proteinase K was diluted with 90  $\mu\text{L}$   
52 of 2M urea, and 5  $\mu\text{L}$  of that mixture was added to 5  $\mu\text{L}$  of AAV sample. The samples were heated at  
53 55°C for 60 min, following the deactivation of proteinase K at 95°C for 20 min. The samples are then  
54 transferred onto a 384-well plate and are ready for analysis. For the heat treatment samples, 5-10  $\mu\text{L}$  of  
55 AAV are heated at 94°C for 10 min, and upon transfer to a 384-well plate, the samples are ready for  
56 analysis. For both sample treatment protocols, the microfluidic chip is loaded with AAV DNA gel-dye  
57 and a lower marker (Revvity) and analyzed using the AAV DNA assay script.

58 **Figure S1. Comparison of VP Properties Across the Two Methods**

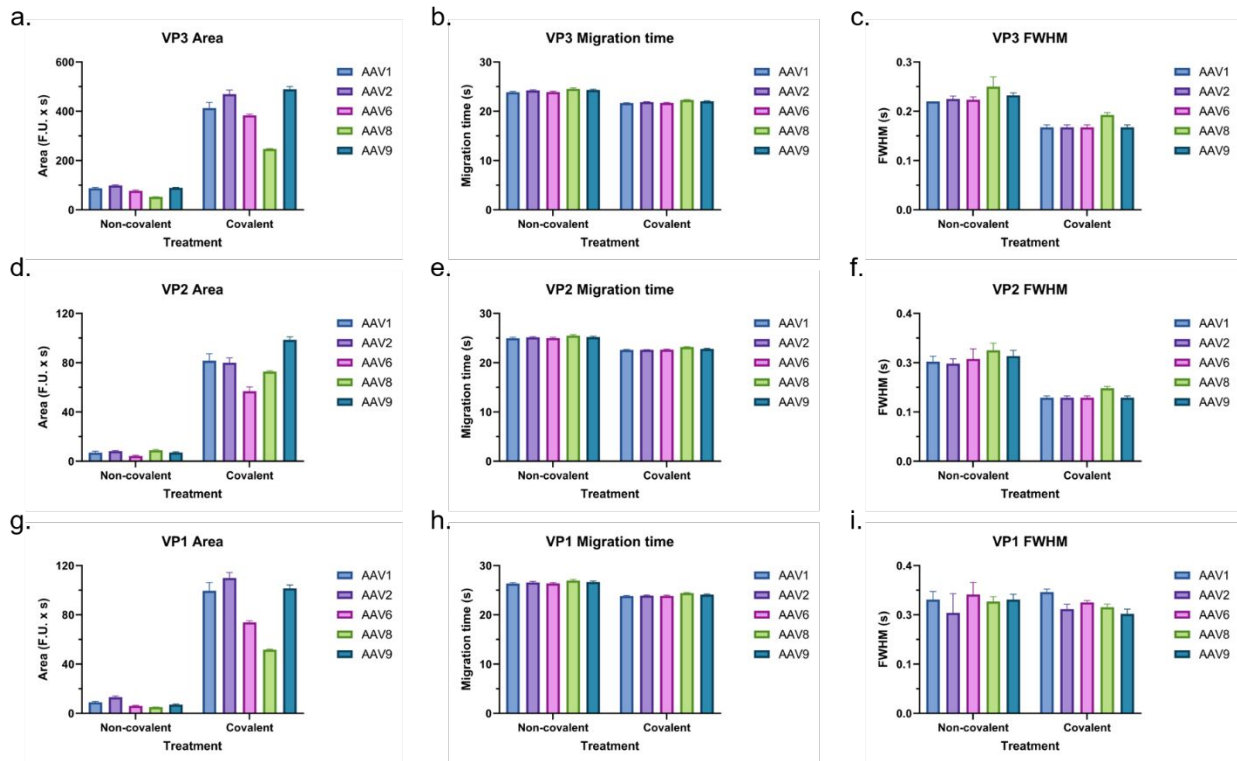

59  
60 **Figure S1:** Comparison of VP properties across the two methods. (a) Area, (b) migration time, and (c)  
61 FWHM of the VP3 peak. (d) Area, (e) migration time, and (f) FWHM of the VP2 peak. (g) Area, (h)  
62 migration time, and (i) FWHM of the VP1 peak. Here, we highlight some of the key electrophoresis  
63 outcomes of the capsid VPs that we can assess with the proposed method and how they compare between  
64 the non-covalent and the covalent dyes. While the covalent peak areas were approximately 6 times larger  
65 than the non-covalent, the VP migration time and full-width half-maximum values were similar across the  
66 serotypes, suggesting a similar degree of protein denaturation and electrophoresis resolution for each  
67 sample.

68 **Table S1. Sizing Accuracy of VPs using the Non-Covalent and Covalent Methods**

69 **Table S1:** Sizing of the different capsid proteins and sizing accuracy (% CV) using the non-covalent and  
70 the covalent methods. The % CV values fall within the  $\leq 20\%$  cutoff value.

| Serotype | Non-Covalent   |                |                |            | Covalent       |                |                |            |
|----------|----------------|----------------|----------------|------------|----------------|----------------|----------------|------------|
|          | VP3 Size (kDa) | VP2 Size (kDa) | VP1 Size (kDa) | % CV       | VP3 Size (kDa) | VP2 Size (kDa) | VP1 Size (kDa) | % CV       |
| AAV1     | 72.9 ± 0.4     | 87.3 ± 0.5     | 107.3 ± 0.6    | 0.6        | 71.7 ± 0.3     | 85.1 ± 0.7     | 104.3 ± 0.6    | 0.6        |
| AAV2     | 77.4 ± 1.2     | 89.8 ± 1.3     | 110.6 ± 1.6    | 1.5        | 74.4 ± 0.3     | 85.3 ± 0.5     | 105.9 ± 0.3    | 0.4        |
| AAV6     | 73.9 ± 0.9     | 88.5 ± 1.1     | 108.4 ± 1.0    | 1.1        | 71.9 ± 0.2     | 85.4 ± 0.3     | 104.5 ± 0.5    | 0.4        |
| AAV8     | 81.7 ± 1.0     | 94.9 ± 1.1     | 116.1 ± 2.0    | 1.4        | 79.8 ± 0.2     | 92.8 ± 0.2     | 113.1 ± 0.5    | 0.3        |
| AAV9     | 78.8 ± 1.0     | 90.7 ± 0.9     | 111.9 ± 0.9    | 1.1        | 75.8 ± 0.2     | 87.3 ± 0.2     | 107.9 ± 0.9    | 0.3        |
|          | <b>Average</b> |                |                | <b>1.1</b> | <b>Average</b> |                |                | <b>0.4</b> |

71

72 **Table S2. Percentage Full Prediction Accuracy of AAV8 Reference Standard**

73 **Table S2:** Percentage full prediction accuracy of AAV8 reference standard accuracy. The % CV values fall  
 74 within the  $\leq 20\%$  cutoff value except for AAV1 57% full. The UV/Vis percentages of full were determined  
 75 using UV/Vis (Stunner).

| Serotype | UV/Vis % Full  | Predicted % Full | Prediction Error (%) | % CV |
|----------|----------------|------------------|----------------------|------|
| AAV1     | 57             | 37.0 $\pm$ 14.3  | 20.0                 | 38.6 |
|          | 29             | 17.5 $\pm$ 3.3   | 11.5                 | 19.1 |
| AAV2     | 62             | 61.6 $\pm$ 4.7   | 0.4                  | 7.6  |
|          | 50             | 48.5 $\pm$ 3.7   | 1.5                  | 7.7  |
| AAV6     | 25             | 24.7 $\pm$ 4.5   | 0.3                  | 18.1 |
|          | 72             | 73.3 $\pm$ 12.6  | 1.3                  | 17.2 |
| AAV8     | 50             | 46.1 $\pm$ 4.8   | 3.9                  | 10.3 |
|          | 25             | 18.5 $\pm$ 3.2   | 6.5                  | 17.5 |
| AAV8     | 70             | 58.4 $\pm$ 6.5   | 11.6                 | 11.2 |
|          | 50             | 44.5 $\pm$ 3.7   | 5.5                  | 8.2  |
| AAV8     | 25             | 20.5 $\pm$ 2.6   | 4.5                  | 12.8 |
|          | <b>Average</b> |                  | 6.1                  | 15.3 |

76

77 **Figure S2. Comparison of UV/Vis (Stunner) and LabChip Percentage Full Predictions**

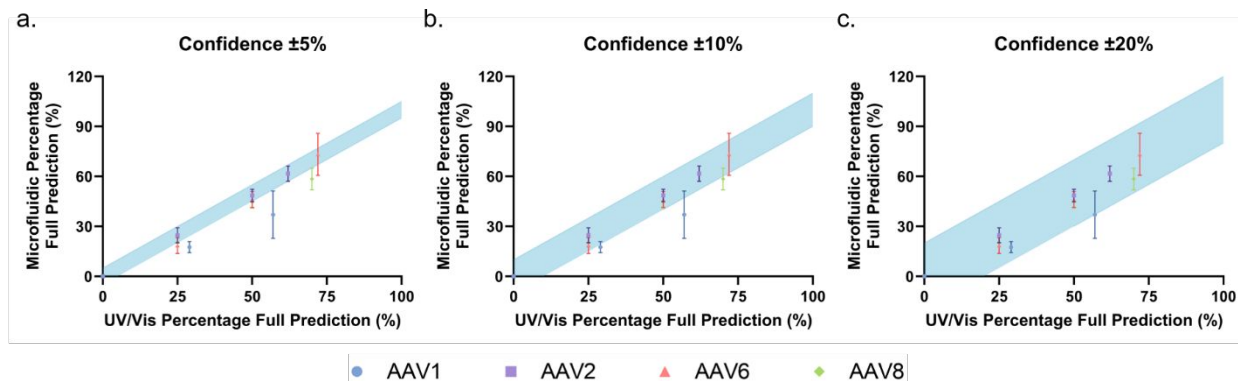

78

79 **Figure S2:** Comparison of the proposed method (LabChip) against UV/Vis (Stunner) at (a)  $\pm 5\%$ , (b)  $\pm$   
 80  $10\%$ , and (c)  $\pm 20\%$  confidence intervals with AAV1, 2, 6, and 8. To assess the performance of our  
 81 microfluidic method against a more adopted method, we looked at how the microfluidic predictions (using  
 82 AAV8 as the reference standard) compared to the UV/Vis (Stunner) estimations. For most serotypes, the  
 83 microfluidic predictions were within  $\pm 5\text{-}10\%$  of the UV/Vis predictions, suggesting a close agreement  
 84 between the methods. However, once again, AAV1 was the outlier, with one of the predictions being closer  
 85 to  $\pm 20\%$ . While we believe this deviation can be attributed to a larger capsid  $\Delta T_m$ , we believe this  
 86 highlights the potential and limitations of the technique, showing high accuracy for serotypes with lower  
 87  $\Delta T_m$  and a higher variation for those closer to the operating capsid  $\Delta T_m$ .
